# Supplementary material
Source: PubMed Central journal article supplement (PMC3633741)
Supplement: NIHMS453267-supplement-Supp_Material.pdf [file NIHMS453267-supplement-Supp_Material.pdf]

# Missense substitutions reflecting regulatory control of transmitter phosphatase activity in two-component signaling

TuAnh Ngoc Huynh,<sup>1†</sup> Chris E. Noriega,<sup>2‡</sup> and Valley Stewart<sup>1,2\*</sup>

<sup>1</sup>Food Science Graduate Group and <sup>2</sup>Department of Microbiology & Molecular Genetics, University of California, Davis, CA 95616-8665, USA.

\*For correspondence. E-mail [vjstewart@ucdavis.edu](mailto:vjstewart@ucdavis.edu); Tel. (+1) 530 754 7994; Fax (+1) 530 752 9014.

<sup>†</sup>Present address: Department of Microbiology, University of Washington, Seattle, WA 98195-7735 USA.

<sup>‡</sup>Present address: BP Global Technology Center, San Diego, CA 92121-3829 USA.

## Supplementary Material

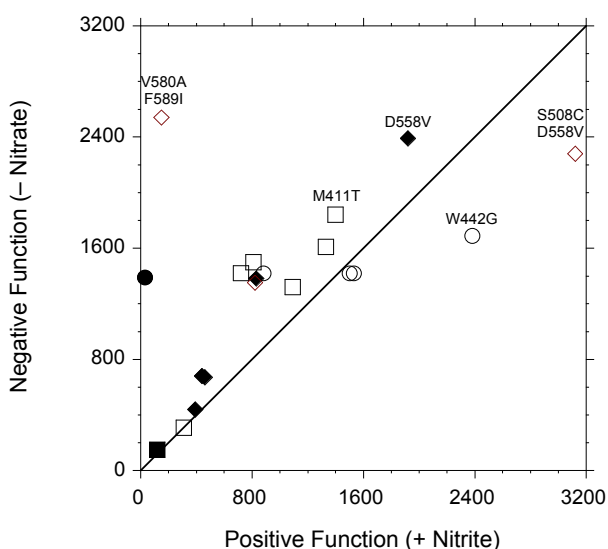

**Fig. S1.** Correlation between nitrite hypersensitivity and  $P^-$  phenotypes. Data from **Table 2** are plotted, with the X axis showing values for the positive function assay (cultures grown with nitrite), and the Y axis showing values for the negative function assay (cultures grown in the absence of nitrate). Corresponding data for the D558V mutant are from **Table S1**. The diagonal line shows the position of 1:1 correspondence, and is *not* a statistical construct drawn from the data. Symbols are: ■,  $narX^+$ ; ●,  $narX$  null; □, DHP domain helix  $\alpha 1$  mutants; ○, DHP domain helix  $\alpha 2$  mutants; ◆, CA domain single substitution mutants; ◇, CA domain double substitution mutants.

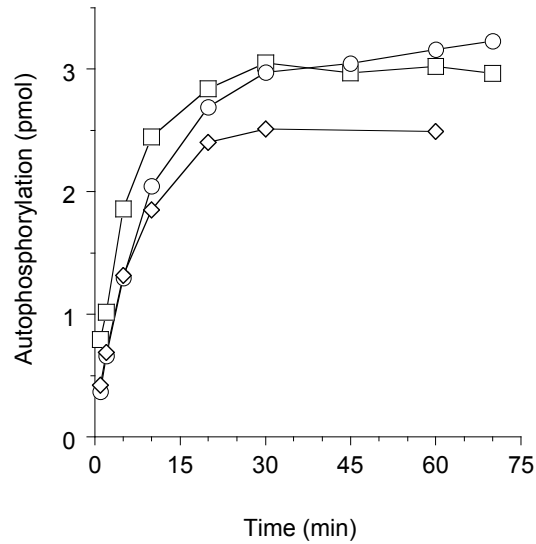

**Fig. S2.** Autophosphorylation by C415R and Y551F mutant versions of MBP-NarX<sub>227</sub> in vitro. □, NarX<sup>+</sup>; ○, C415R; ◇, Y551F; ●, His<sub>6</sub>-NarL.

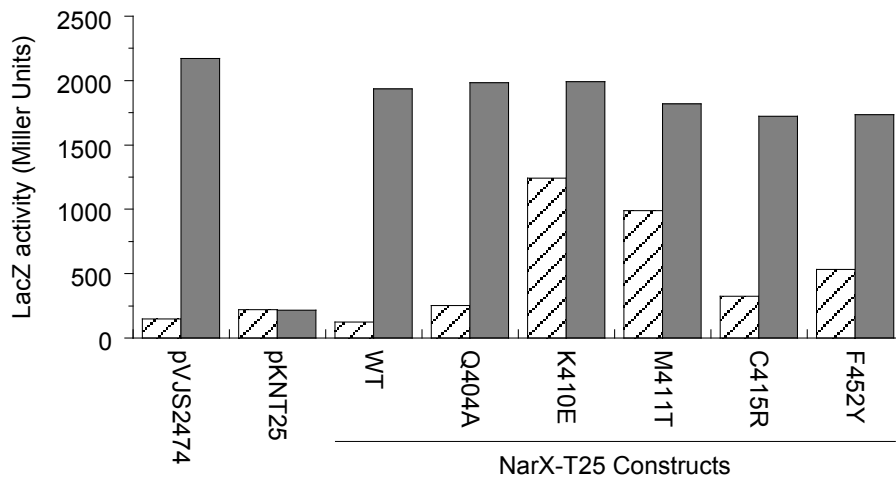

**Fig. S3.** In vivo functionality of NarX-T25 fusion proteins. LacZ synthesis results from expression of the chromosomal  $\Phi(narG-lacZ)$  reporter in the *narX narQ* double null strain VJS3041. Striped and filled bars show data from cultures grown in the absence and presence of nitrate, respectively. Plasmid pVJS2474 encodes wild-type NarX. Plasmid pKNT25 is the empty T25 fusion vector.

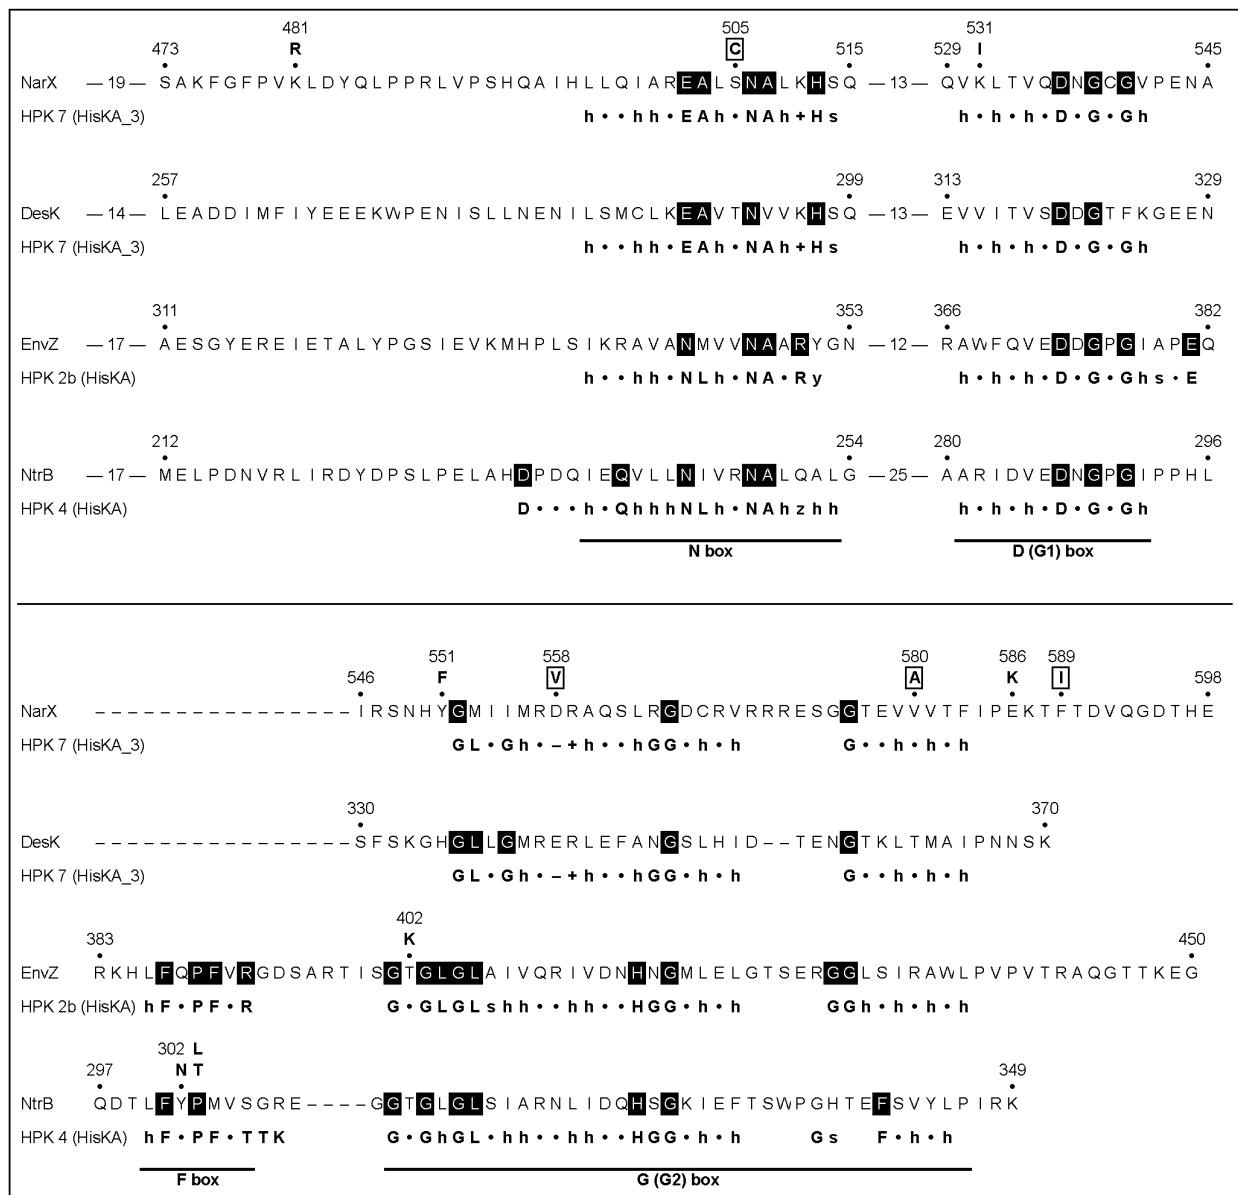

**Fig. S4.** CA domain sequences. Conserved motifs are as described (Grebe and Stock, 1999). Residues that match the motif sequence are enclosed in black boxes. Substitutions resulting in the  $K^+ P^-$  phenotype are shown above the sequence. For NarX, double substitutions are enclosed in boxes.

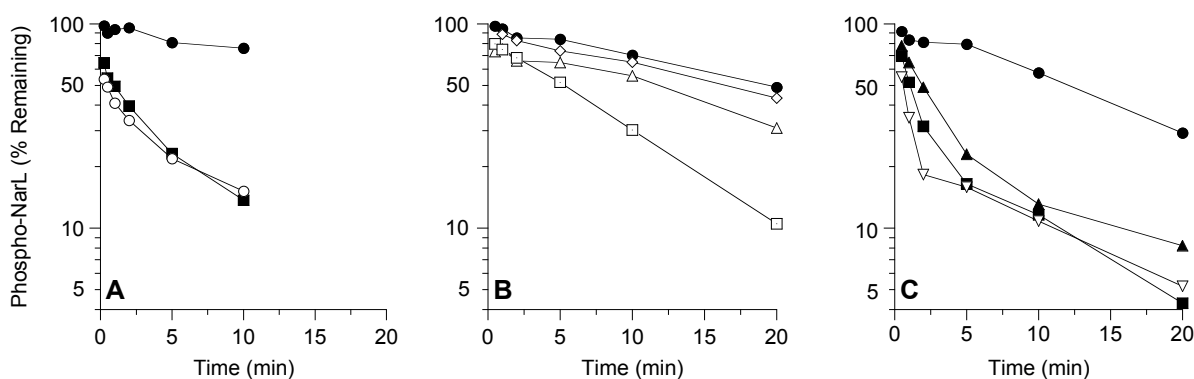

**Fig. S5.** Concentration dependence of MBP-NarX<sub>227</sub> transmitter phosphatase activity in vitro. [<sup>32</sup>P]-Phospho-NarL was prepared, added to different concentrations of NarX dimers, and sampled for analysis as described in Experimental Procedures.

**A.** ●, no sensor; ■, 0.5 μM NarX<sup>+</sup> (dimers; standard concentration for all other experiments); ○, 5.0 μM.

**B.** ●, no sensor; ◇, 0.01 μM NarX<sup>+</sup> (dimers); △, 0.05 μM; □, 0.1 μM.

**C.** ●, no sensor; ▲, 0.2 μM NarX<sup>+</sup> (dimers); ■, 0.5 μM (standard concentration for all other experiments); ▽, 1.0 μM.

**Table S1.** Effects of *narX* missense substitutions on  $\Phi(narG-lacZ)$  expression.

| Allele <sup>b</sup>      | Region <sup>c</sup>  | $\beta$ -Galactosidase <sup>a</sup> |         |       |                                |                    |                    |
|--------------------------|----------------------|-------------------------------------|---------|-------|--------------------------------|--------------------|--------------------|
|                          |                      | Negative Function <sup>d</sup>      |         |       | Positive Function <sup>e</sup> |                    |                    |
|                          |                      | None                                | Nitrate | Ratio | None                           | Nitrate            | Nitrite            |
| pHG165                   | —                    | 1,170                               | 1,100   | 0.9   | 11 <sup>f</sup>                | 10 <sup>f</sup>    | 17 <sup>f</sup>    |
| <i>narX</i> <sup>†</sup> | —                    | 330                                 | 1,310   | 4.3   | 17                             | 1860               | 240                |
| Q412R                    | DHp helix $\alpha$ 1 | 370                                 | 1,210   | 3.3   | 60 <sup>f</sup>                | 2,090 <sup>f</sup> | 220 <sup>f</sup>   |
| V413M                    | DHp helix $\alpha$ 1 | 3,200                               | 1,040   | 0.3   | 120 <sup>f</sup>               | 2,330 <sup>f</sup> | 1,250 <sup>f</sup> |
| Q412R+V413M              | DHp helix $\alpha$ 1 | 1,710                               | 1,070   | 0.6   | 100 <sup>f</sup>               | 1,530 <sup>f</sup> | 1,300 <sup>f</sup> |
| D558V                    | CA                   | 2,390                               | 1,020   | 0.4   | 130                            | 1,710              | 1,920              |
| S508C + D558V            | CA                   | 2,380                               | 1,070   | 0.4   | 2,470                          | 2,120              | 2,250              |

<sup>a</sup> Activity was measured as described in Materials and Methods, and is expressed in Miller units.

<sup>b</sup> Amino-acyl residue substitutions. *narX* alleles located on plasmid pVJS1241 or pVJS2474 derivatives.

<sup>c</sup> Location within NarX protein structure; see text for details.

<sup>d</sup> Negative function assayed in strain VJS4033 [ $\Phi(narG-lacZ)$  *narL505* (V88A) *narP*<sup>+</sup>  $\Delta narX$  *narQ*::Tn10 *pcnB*<sup>+</sup>].

<sup>e</sup> Positive function assayed in strain VJS5054 [ $\Phi(narG-lacZ)$  *narL*<sup>+</sup> *narP*<sup>+</sup>  $\Delta narX$  *narQ*::Tn10 *pcnB1*].

<sup>f</sup> Positive function data from reference (Noriega *et al.*, 2010).

**Table S2.** Strains and plasmids.

| Strain                              | Genotype                                                                                                                              | Source                          |
|-------------------------------------|---------------------------------------------------------------------------------------------------------------------------------------|---------------------------------|
| <b><i>E. coli</i> K-12 strains:</b> |                                                                                                                                       |                                 |
| VJS2197                             | F <sup>-</sup> λ <sup>-</sup> prototroph Δ( <i>argF-lac</i> )U169 λΦ( <i>narG-lacZ</i> )250                                           | (Rabin and Stewart, 1993)       |
| VJS10304                            | F <sup>-</sup> λ <sup>-</sup> prototroph Δ <i>cya-854</i> Δ <i>narX</i> Δ <i>narQ</i>                                                 | This study                      |
| <b>Derivatives of VJS2197:</b>      |                                                                                                                                       |                                 |
| VJS4033                             | Δ <i>narX</i> 242 <i>narL</i> 505(V88A) <i>yhcO</i> 2084::Ω-Cm<br><i>narQ</i> 251::Tn10d(Tc)                                          | (Rabin and Stewart, 1993)       |
| VJS5054                             | Δ <i>narX</i> 242 <i>narQ</i> 251::Tn10d(Tc) <i>pcnB</i> 1<br><i>zad-981</i> ::Tn10d(Km)                                              | (Williams and Stewart, 1997b)   |
| VJS5720                             | Δ <i>narX</i> 242 <i>narL</i> 505(V88A) <i>yhcO</i> 2084::Ω-Cm<br><i>narQ</i> 251::Tn10d(Tc) <i>pcnB</i> 1 <i>zad-981</i> ::Tn10d(Km) | (Williams and Stewart, 1997b)   |
| <b>Plasmids:</b>                    |                                                                                                                                       |                                 |
| pHG165                              | Ap <sup>r</sup> ; <i>ori</i> pMB1; <i>lacZ</i> α pUC8 polylinker                                                                      | (Stewart <i>et al.</i> , 1986)  |
| pUT18C                              | Ap <sup>r</sup> ; T18 fragment (amino acids 225 to 399 of <i>CyaA</i> )                                                               | (Karimova <i>et al.</i> , 1998) |
| pKNT25                              | Km <sup>r</sup> ; T25 fragment (the first 224 amino acids of <i>CyaA</i> )                                                            | (Karimova <i>et al.</i> , 1998) |
| pVJS1241                            | As pHG165 but <i>narX</i> <sup>t</sup>                                                                                                | (Williams and Stewart, 1997b)   |
| pVJS2474                            | As pHG165 but <i>narX</i> <sup>t</sup>                                                                                                | (Appleman and Stewart, 2003)    |
| pVJS5321                            | As pKNT25 but <i>narX</i> <sup>t</sup>                                                                                                | This study                      |
| pVJS5753                            | As pUT18C but <i>narL</i> ' (REC domain)                                                                                              | This study                      |
